# Supplementary material
Source: publisher figshare collection journal article supplement (https://adisjournals.figshare.com/articles/dataset/_/21953120)
Supplement: Supplementary file 1 [file 1]

# Podcast on the Art of the Patient Conversation: Healthcare Provider Perspectives to Improve Outcomes in Multiple Sclerosis

Cortnee Roman, MSN, Denise Bruen, MSN

## Four strategies that can facilitate improved patient-provider communication<sup>1</sup>

### 1 Patient-centric language

Making written and oral information easier to understand<sup>1,2</sup>

**Benefit:** Prevents the patient from feeling intimidated or excluded, allows them to actively participate in the discussion, and eliminates confusion or misunderstanding

Reduce medical jargon

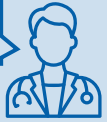

#### Example

Instead of **chronic**, you could say **occurring over a long time**

### 2 Teach-back

Asking patients to **repeat in their own words** what they understand and/or need to know or do, in a non-shaming way<sup>1</sup>

**Benefit:** Tests how well the HCP has explained a concept and provides an opportunity to re-teach the information as needed

#### Example

"I want to check how well I explained the signs and symptoms of MS. Could you tell me, in your own words, what symptoms to look out for?"

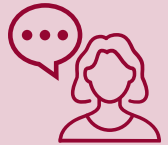

### 3 Open-ended questions

Elicit a thoughtful response from the patient<sup>1</sup>

**Benefit:** May bring additional details about the patient and/or their understanding to light, and allows the HCP to ask more focused follow-up questions to gather specific details

#### Example

"What MS symptoms do you experience on a daily basis?"

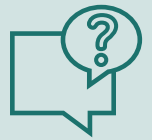

### 4 Active listening and paraphrasing

**Demonstrate listening**, state what has been heard, and **show understanding** without implying agreement or evaluating<sup>1</sup>

**Benefit:** Offers an opportunity for the patient to be sure their HCP correctly understands them, providing confidence that their message has been heard

#### Example

"I'm hearing that one of the most bothersome symptoms for you currently is nerve pain in your legs. Is that correct?"

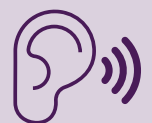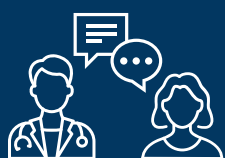

**Comprehensive patient conversations and optimized patient interactions** build a trustworthy foundation for shared decision-making to **improve health literacy and outcomes** in patients with MS<sup>1,3</sup>

**References:** 1. Roman C, et al. Presented at: Consortium of MS Centers (CMSC) Annual Meeting; October 25–28, 2021; Orlando, FL and Virtual. 2. National Institutes of Health. Accessed July 26, 2022. <https://www.nih.gov/institutes-nih/nih-office-director/office-communications-public-liaison/clear-communication>; 3. Col NF, et al. BMC Med Inform Decis Mak. 2018;38:267.

**Abbreviations:** HCP healthcare provider, MS multiple sclerosis

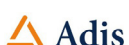

PEER-REVIEWED  
FEATURE

This is a summary of a podcast article published in *Neurology and Therapy*, 2022. doi:10.1007/s40120-023-00446-z

This infographic represents the opinions of the authors. For a full list of declarations, including funding and author disclosure statements, please see the full text online. © The authors, CC-BY-NC 2022. Prepared by Envision Pharma Group. Infographic was funded by Novartis. The original authors of the manuscript reviewed this infographic.
